# Supplementary material
Source: publisher figshare collection journal article supplement (https://frontiersin.figshare.com/ndownloader/files/14859431)
Supplement: Supplementary file 1 [file 14859431]

**Supplementary material Appendix 3** The Newick version of the phylogeny of seed plants of Mount Kenya

(((((((((((((((((((((Tetradenia_urticifolia:32.8843,(Stachys_aculeolata:16.4421,Stachys_alpigena:16.4421)Stachys:16.4421,(Pycnostachys_meyeri:16.4421,Pycnostachys_deflexifolia:16.4421,Pycnostachys_nepetifolia:16.4421)Pycnostachys:16.4421,Tinnea_aethiopica:32.8843,(Vitex_strickeri:16.4421,Vitex_keniensis:16.4421)Vitex:16.4421,Aeollanthus_repens:32.8843,Ajuga_integrifolia:32.8843,(Clinopodium_abyssinicum:16.4421,Clinopodium_uhligii:16.4421,Clinopodium_simense:16.4421,Clinopodium_kilimandschari:16.4421)Clinopodium:16.4421,(Leucas_volkensii:16.4421,Leucas_masaiensis:16.4421,Leucas_glabrata:16.4421)Leucas:16.4421,Fuerstia_africana:32.8843,(Leonotis_nepetifolia:16.4421,Leonotis_ocymifolia:16.4421)Leonotis:16.4421,(Micromeria_sp1:16.4421,Micromeria_sp2:16.4421)Micromeria:16.4421,(Plectranthus_scandens:16.4421,Plectranthus_kamerunensis:16.4421,Plectranthus_punctatus:16.4421,Plectranthus_autranii:16.4421,Plectranthus_alpinus:16.4421,Plectranthus_alboviolaceus:16.4421,Plectranthus_sylvestris:16.4421,Plectranthus_longipes:16.4421,Plectranthus_lanuginosus:16.4421,Plectranthus_melleri:16.4421,Plectranthus_hadiensis:16.4421,Plectranthus_pauciflorus:16.4421)Plectranthus:16.4421,Endostemon_tereticaulis:32.8843,(Ocimum_decumbens:16.4421,Ocimum_lamiifolium:16.4421,Ocimum_kenyense:16.4421,Ocimum_obovatum:16.4421,Ocimum_kilimandscharicum:16.4421,Ocimum_forsskaolii:16.4421)Ocimum:16.4421,Premna_maxima:32.8843,Platostoma_denticulatum:32.8843,Clerodendrum_rotundifolium:32.8843,Salvia_merjamie:32.8843,Nepeta_azurea:32.8843,Rotheca_myricoides:32.8843,((Clerodendrum_johnstonii:12.81,((Achyrospermum_schimperi:2.63307,Achyrospermum_carvalhoi:2.63308):4.54433,(Stachys_argillicola:3.11666,(Leucas_martinicensis:0.093887,Leucas_grandis:0.093887):3.02277):4.06075):5.63258):9.67668,((Ocimum_gratissimum:1.28027,((Plectranthus_laxiflorus:0.704427,Plectranthus_barbatus:0.704427):0.36056,Pycnostachys_umbrosa:1.06499):0.215288):6.09351,(Mentha_longifolia:5.92608,Salvia_nilotica:5.92609):1.4477):15.1129):10.3976)Lamiaceae:8.51031,(((Diclis_bambuseti:37.4579,Hebenstretia_angolensis:37.4579,(Verbascum_sinaiticum:18.7289,Verbascum_brevipedicellatum:18.7289)Verbascum:18.7289,Buddleja_polystachya:37.4579,Limosella_africana:37.4579,(Limosella_macrantha:13.9759,Selago_thomsonii:13.9759):23.482)Scrophulariaceae:3.50966,(Streptocarpus_montanus:37.3946,Streptocarpus_glandulosissimus:37.3946)Gesneriaceae:3.57298):0.094686,(((Lantana_viburnoides:28.391,Lippia_javanica:28.391)Verbenaceae:0.812672,(Markhamia_lutea:6.50729,Kigelia_africana:6.50728):22.6964):8.92915,(Halleria_lucida:26.8826,Nuxia_congesta:26.8826)Stilbaceae:11.2503):2.92938):0.332342):0.621584,((Isoglossa_gregoryi:18.3605,Isoglossa_punctata:18.3605,Isoglossa_lactea:18.3605)Isoglossa:18.3605,Rhinacanthus_ndorensis:36.721,(Mimulopsis_alpina:18.3605,Mimulopsis_arborescens:18.3605)Mimulopsis:18.3605,Acanthopale_pubescens:36.721,Asystasia_mysorensis:36.721,(Barleria_ventricosa:18.3605,Barleria_volkensii:18.3605)Barleria:18.3605,(Dicliptera_laxata:18.3605,Dicliptera_cordibracteata:18.3605)Dicliptera:18.3605,(Justicia_striata:18.3605,Justicia_unyorensis:18.3605,Justicia_anagalloides:18.3605,Justicia_diclipteroides:18.3605,Justicia_nyassana:18.3605)Justicia:18.3605,Crossandra_friesiorum:36.721,(Dyschoriste_radicans:18.3605,Dyschoriste_multicaulis:18.3605)Dyschoriste:18.3605,(Hypoestes_triflora:18.3605,Hypoestes_forsskaolii:18.3605)Hypoestes:18.3605,Acanthus_eminens:36.721,(Thunbergia_fischeri:18.3605,Thunbergia_petersiana:18.3605)Thunbergia:18.3605,(Thunbergia_alata:25.1418,(Hypoestes_aristata:16.3275,(Phaulopsis_imbricata:8.72974,(Duosperma_kilimandscharicum:7.37291,Ruellia_patula:7.37291):1.35682):7.59772):8.81439):11.5791)Acanthaceae:5.29517):0.129732,((Bartsia_decurva:17.747,Bartsia_longiflora:17.747)Bartsia:17.747,Alectra_asperrima:35.494,(Cycnium_tenuisectum:17.747,Cycnium_volkensii:17.747,Cycnium_herzfeldianum:17.747)Cycnium:17.747,Sopubia_karaguensis:35.494,(Hedbergia_abyssinica:30.6473,(Orobanche_minor:27.466,Cycnium_tubulosum:27.466):3.18125):4.84677)Orobanchaceae:6.65187):0.182246,((Utricularia_arenaria:19.9756,Utricularia_livida:19.9756)Utricularia:19.9756,Utricularia_australis:39.9512)Lentibulariaceae:2.37694):0.432809,(((Callitriche_keniensis:15.854,Callitriche_vulcanicola:15.854,Callitriche_anisoptera:15.854,Callitriche_oreophila:15.854)Callitriche:15.854,(Veronica_gunae:15.854,Veronica_anagallisaquatica:15.854)Veronica:15.854,Sibthorpia_europaea:31.7079,(Plantago_palmata:8.39684,(Veronica_glandulosa:1.69785,Veronica_abyssinica:1.69785):6.69898):23.3111)Plantaginaceae:1.21457,(Crepidorhopalon_whytei:20.5859,Craterostigma_pumilum:20.5859)Linderniaceae:12.3366):9.83844):13.4796,((Olea_capensis:4.71656,Olea_europaea:4.71656):18.0344,(Jasminum_grandiflorum:5.17372,(Jasminum_abyssinicum:2.38711,Jasminum_fluminense:2.38711):2.78661):17.5773):33.4895):16.5865,(((Solanum_mauense:23.5138,Solanum_agnewiorum:23.5138,Solanum_phoxocarpum:23.5138,Solanum_schumannianum:23.5138,Solanum_tettense:23.5138,Solanum_runsoriense:23.5138,Solanum_nakurense:23.5138,Solanum_tarderemotum:23.5138,Solanum_terminale:23.5138,Solanum_campylacanthum:23.5138)Solanum:23.5138,(Discopodium_penninervium:6.8691,(Solanum_americanum:3.42046,(Solanum_aculeatissimum:1.46506,(Solanum_giganteum:0.145544,(Solanum_aculeastrum:0.125868,(Solanum_nigriviolaceum:0.030224,Solanum_anguivi:0.030226):0.095643):0.019677):1.31952):1.9554):3.44864):40.1585)Solanaceae:9.21285,(Falkia_canescens:54.147,Cuscuta_kilimanjari:54.147,(Ipomoea_tenuirostris:27.0735,Ipomoea_wightii:27.0735)Ipomoea:27.0735,Convolvulus_kilimandschari:54.147,((Dichondra_repens:24.3396,Cuscuta_planiflora:24.3396):8.4515,((Convolvulus_farinosus:18.643,Convolvulus_siculus:18.643):7.64144,(Ipomoea_eriocarpa:10.225,(Astripomoea_malvacea:7.97119,Ipomoea_polymorpha:7.97119):2.25377):16.0595):6.50662):21.3559)Convolvulaceae:2.0935):16.5865):0.542387,(((Secamone_punctulata:37.6083,(Cynanchum_abyssinicum:18.8041,Cynanchum_altiscandens:18.8041,Cynanchum_viminale:18.8041,Cynanchum_schistoglossum:18.8041)Cynanchum:18.8041,Huernia_keniensis:37.6083,Pentarrhinum_gonoloboides:37.6083,Tylophoropsis_heterophylla:37.6083,Acokanthera_schimperi:37.6083,Ceropegia_meyerijohannis:37.6083,Cryptolepis_oblongifolia:37.6083,Tabernaemontana_stapfiana:37.6083,(Dregea_schimperi:18.8041,Dregea_abyssinica:18.8041)Dregea:18.8041,(Aspidoglossum_connatum:18.8041,Aspidoglossum_elliotii:18.8041)Aspidoglossum:18.8041,(Gomphocarpus_stenophyllus:18.8041,Gomphocarpus_integer:18.8041)Gomphocarpus:18.8041,Landolphia_buchananii:37.6083,Periploca_linearifolia:37.6083,Pachycarpus_rhinophyllus:37.6083,Tacazzea_conferta:37.6083,Brachystelma_keniense:37.6083,(Rauvolfia_mannii:28.8216,(Carissa_spinarum:16.6567,((Gomphocarpus_fruticosus:0.290901,Xysmalobium_undulatum:0.290901):4.07123,Mondia_whitei:4.36213):12.2946):12.165):8.78662)Apocynaceae:14.4206,(Sebaea_brachyphylla:29.6472,(Swertia_usambarensis:14.8236,Swertia_subnivalis:14.8236,Swertia_lugardae:14.8236,Swertia_scandens:14.8236)Swertia:14.8236,(Anthocleista_grandiflora:14.3274,((Swertia_volkensii:0.586204,Swertia_kilimandscharica:0.586204):2.50757,Swertia_crassiuscula:3.09378):11.2336):15.3198)Gentianaceae:22.3816):6.77608,((Galium_scioanum:28.435,Galium_thunbergianum:28.435,Galium_chloroionanthum:28.435,Galium_simense:28.435,Galium_ossirwaense:28.435,Galium_ruwenzoriense:28.435,Galium_glaciale:28.435,Galium_kenyanum:28.435,Galium_acrophyum:28.435,Galium_aparinoides:28.435)Galium:28.435,(Oldenlandia_friesiorum:28.435,Oldenlandia_monanthos:28.435,Oldenlandia_scopulorum:28.435,Oldenlandia_capensis:28.435,Oldenlandia_herbacea:28.435)Oldenlandia:28.435,Tarenna_pavettoides:56.8699,Canthium_oligocarpum:56.8699,(Pentas_sp2:28.435,Pentas_sp1:28.435,Pentas_zanzibarica:28.435)Pentas:28.435,Parapentas_battiscombei:56.8699,(Psychotria_fractinervata:28.435,Psychotria_orophila:28.435,Psychotria_lauracea:28.435)Psychotria:28.435,Afrocanthium_keniense:56.8699,Galiniera_saxifraga:56.8699,Mussaenda_microdonta:56.8699,Pentanisia_foetida:56.8699,Anthospermum_usambarense:56.8699,(Pavetta_oliveriana:28.435,Pavetta_hymenophylla:28.435)Pavetta:28.435,Rothmannia_urcelliformis:56.8699,Coptosperma_graveolens:56.8699,Rytigynia_bugoyensis:56.8699,Vangueria_volkensii:56.8699,(((Lasianthus_kilimandscharicus:27.4765,Pauridiantha_paucinervis:27.4765):9.57665,((Geophila_repens:14.8808,(Psychotria_kirkii:5.6653,(Psychotria_capensis:4.85625,Psychotria_mahonii:4.85625):0.809052):9.21547):17.717,(Rubia_cordifolia:23.6338,(Anthospermum_herbaceum:22.943,(Pentanisia_ouranogyne:21.7381,(Kohautia_coccinea:14.3009,(Oldenlandia_lancifolia:6.28421,Spermacoce_princeae:6.28421):8.01665):7.43719):1.20492):0.690823):8.96398):4.45537):10.5937,(Fleroya_rubrostipulata:33.1855,((Ixora_scheffleri:11.3773,((Keetia_gueinzii:8.258,(Psydrax_parviflora:4.53528,Psydrax_schimperiana:4.53528):3.72273):0.847486,(Rytigynia_uhligii:7.29496,Vangueria_infausta:7.29496):1.81053):2.27182):2.77938,((Rothmannia_manganjae:7.77154,Pavetta_abyssinica:7.77154):0.335581,Heinsenia_diervilleoides:8.10713):6.04956):19.0289):14.4613):9.22313)Rubiaceae:1.93497)Gentianales:14.5645):1.62956,(Lithospermum_afromontanum:55.7952,(Cynoglossum_amplifolium:27.8976,Cynoglossum_aequinoctiale:27.8976,Cynoglossum_coeruleum:27.8976,Cynoglossum_lanceolatum:27.8976)Cynoglossum:27.8976,(Myosotis_keniensis:27.8976,Myosotis_abyssinica:27.8976)Myosotis:27.8976,Cordia_africana:55.7952,(Heliotropium_steudneri:27.8976,Heliotropium_scotteae:27.8976)Heliotropium:27.8976,(Ehretia_cymosa:47.9841,Heliotropium_zeylanicum:47.9841):7.8111)Boraginaceae:19.2038):4.13767,Apodytes_dimidiata:79.1367):23.7348,((((Dipsacus_pinnatifidus:65.6031,Pterocephalus_frutescens:65.6031,Valeriana_kilimandscharica:65.6031,Valerianella_microcarpa:65.6031,(Scabiosa_columbaria:46.4875,Valeriana_capensis:46.4875):19.1157)Caprifoliaceae:25.7528,Sambucus_africana:91.3559)Dipsacales:4.96097,((((Bothriocline_ugandensis:22.8719,Bothriocline_longipes:22.8719,Bothriocline_fusca:22.8719,Bothriocline_amplifolia:22.8719)Bothriocline:22.8719,(Conyza_pallidiflora:22.8719,Conyza_steudelii:22.8719,Conyza_clarenceana:22.8719,Conyza_schimperi:22.8719,Conyza_vernonioides:22.8719,Conyza_ruwenzoriensis:22.8719,Conyza_tigrensis:22.8719,Conyza_newii:22.8719)Conyza:22.8719,Cotula_abyssinica:45.7437,Gymnanthemum_urticifolium:45.7437,Melanthera_scandens:45.7437,(Microglossa_pyrifolia:22.8719,Microglossa_densiflora:22.8719)Microglossa:22.8719,Mikania_chenopodifolia:45.7437,(Crassocephalum_vitellinum:22.8719,Crassocephalum_picridifolium:22.8719)Crassocephalum:22.8719,Orbivestus_karaguensis:45.7437,Pseudognaphalium_oligandrum:45.7437,(Crepis_rueppellii:22.8719,Crepis_newii:22.8719,Crepis_carbonaria:22.8719,Crepis_dianthoseris:22.8719)Crepis:22.8719,(Dichrocephala_integrifolia:22.8719,Dichrocephala_sp2:22.8719,Dichrocephala_sp1:22.8719)Dichrocephala:22.8719,(Helichrysum_ellipticifolium:22.8719,Helichrysum_meyerijohannis:22.8719,Helichrysum_newii:22.8719,Helichrysum_sp2:22.8719,Helichrysum_sp4:22.8719,Helichrysum_chionoides:22.8719,Helichrysum_argyranthum:22.8719,Helichrysum_kilimanjari:22.8719,Helichrysum_schimperi:22.8719,Helichrysum_sp5:22.8719,Helichrysum_stenopterum:22.8719,Helichrysum_nudifolium:22.8719,Helichrysum_globosum:22.8719,Helichrysum_kirkii:22.8719,Helichrysum_sp3:22.8719,Helichrysum_maranguense:22.8719,Helichrysum_sp6:22.8719,Helichrysum_citrispinum:22.8719,Helichrysum_sp1:22.8719)Helichrysum:22.8719,Prenanthes_subpeltata:45.7437,(Senecio_purtschelleri:22.8719,Senecio_keniophytum:22.8719,Senecio_pseudosubsessilis:22.8719,Senecio_hochstetteri:22.8719,Senecio_hadiensis:22.8719,Senecio_mesogrammoides:22.8719,Senecio_ruwenzoriensis:22.8719,Senecio_schweinfurthii:22.8719,Senecio_jacksonii:22.8719,Senecio_aequinoctialis:22.8719,Senecio_roseiflorus:22.8719,Senecio_hedbergii:22.8719,Senecio_crispatipilosus:22.8719,Senecio_moorei:22.8719,Senecio_syringifolius:22.8719,Senecio_lyratus:22.8719,Senecio_subsessilis:22.8719)Senecio:22.8719,(Bidens_flagellata:22.8719,Bidens_kilimandscharica:22.8719)Bidens:22.8719,(Solanecio_nandensis:22.8719,Solanecio_angulatus:22.8719)Solanecio:22.8719,Emilia_debilis:45.7437,(Sonchus_bipontini:22.8719,Sonchus_camporum:22.8719)Sonchus:22.8719,(Gnaphalium_sp1:22.8719,Gnaphalium_sp2:22.8719)Gnaphalium:22.8719,(Vernonia_syringifolia:22.8719,Vernonia_auriculifera:22.8719,Vernonia_hochstetteri:22.8719,Vernonia_holstii:22.8719,Vernonia_subscandens:22.8719,Vernonia_pteropoda:22.8719)Vernonia:22.8719,Athrixia_rosmarinifolia:45.7437,(Carduus_sp2:22.8719,Carduus_sp4:22.8719,Carduus_silvarum:22.8719,Carduus_keniensis:22.8719,Carduus_millefolius:22.8719,Carduus_afromontanus:22.8719,Carduus_sp3:22.8719,Carduus_sp1:22.8719)Carduus:22.8719,Mikaniopsis_bambuseti:45.7437,Acmella_caulirhiza:45.7437,Adenostemma_mauritianum:45.7437,Distephanus_biafrae:45.7437,Felicia_abyssinica:45.7437,Sphaeranthus_suaveolens:45.7437,Gerbera_viridifolia:45.7437,(Guizotia_scabra:22.8719,Guizotia_jacksonii:22.8719)Guizotia:22.8719,Centrapalus_pauciflorus:45.7437,Tripteris_volkensii:45.7437,Anisopappus_chinensis:45.7437,(Aspilia_mossambicensis:22.8719,Aspilia_pluriseta:22.8719)Aspilia:22.8719,Berkheya_spekeana:45.7437,(Gutenbergia_rueppellii:22.8719,Gutenbergia_cordifolia:22.8719)Gutenbergia:22.8719,Micractis_bojeri:45.7437,Gynura_scandens:45.7437,(Dendrosenecio_keniensis:22.8719,Dendrosenecio_battiscombei:22.8719,Dendrosenecio_keniodendron:22.8719)Dendrosenecio:22.8719,Blumea_elatior:45.7437,Ethulia_vernonioides:45.7437,Anthemis_tigrensis:45.7437,Stoebe_kilimandscharica:45.7437,Kleinia_abyssinica:45.7437,(Lactuca_glandulifera:22.8719,Lactuca_inermis:22.8719)Lactuca:22.8719,Laphangium_luteoalbum:45.7437,Linzia_purpurea:45.7437,Echinops_aberdaricus:45.7437,Erigeron_alpinus:45.7437,Euryops_brownei:45.7437,((Haplocarpha_rueppellii:36.3187,Haplocarpha_schimperi:36.3187):4.10779,(((Gerbera_piloselloides:13.1921,(Tolpis_capensis:6.04131,Helichrysum_glumaceum:6.04131):7.15078):1.84284,Echinops_hoehnelii:15.0349):19.9056,(((Vernonia_brachycalyx:12.5433,Baccharoides_lasiopus:12.5433):19.024,(Sonchus_afromontanus:1.26717,Sonchus_luxurians:1.26717):30.3001):0.673878,((((Blumea_brevipes:0.335095,Laggera_crispata:0.335095):23.6826,((Cineraria_deltoidea:3.61954,(Senecio_deltoideus:3.49283,Emilia_discifolia:3.49283):0.126712):2.73292,(Solanecio_mannii:2.42672,(Crassocephalum_rubens:1.17422,(Crassocephalum_montuosum:0.443616,Crassocephalum_crepidioides:0.443616):0.730604):1.2525):3.92574):17.6653):0.266235,(Conyza_subscaposa:4.85424,Psiadia_punctulata:4.85423):19.4297):3.98855,((Artemisia_afra:18.8844,(Helichrysum_foetidum:3.03669,Helichrysum_odoratissimum:3.03669):15.8477):5.70933,Bidens_pilosa:24.5937):3.67877):3.96867):2.69932):5.48598):5.31722)Asteraceae:37.92,(Campanula_edulis:52.9672,(Wahlenbergia_capillacea:26.4836,Wahlenbergia_scottii:26.4836,Wahlenbergia_pusilla:26.4836)Wahlenbergia:26.4836,Canarina_eminii:52.9672,(Lobelia_duriprati:26.4836,Lobelia_telekii:26.4836,Lobelia_sp2:26.4836,Lobelia_sp1:26.4836,Lobelia_minutula:26.4836,Lobelia_giberroa:26.4836,Lobelia_baumannii:26.4836,Lobelia_bambuseti:26.4836,Lobelia_holstii:26.4836)Lobelia:26.4836,Monopsis_stellarioides:52.9672,(Lobelia_aberdarica:35.8155,(Wahlenbergia_krebsii:9.66168,Wahlenbergia_virgata:9.66168):26.1538):17.1518)Campanulaceae:30.6964)Asterales:11.7531,((Cussonia_arborea:65.5005,Hydrocotyle_sibthorpioides:65.5005,(((Cussonia_holstii:7.00536,Cussonia_spicata:7.00536):15.3089,Schefflera_volkensii:22.3142):29.7618,(Polyscias_kikuyuensis:1.59519,Polyscias_fulva:1.59519):50.4808):13.4245)Araliaceae:11.0783,(((Afrosciadium_sp1:35.7241,Afrosciadium_kerstenii:35.7241,Afrosciadium_sp2:35.7241,Afrosciadium_englerianum:35.7241,Afrosciadium_harmsianum:35.7241)Afrosciadium:35.7241,(Afroligusticum_elgonense:35.7241,Afroligusticum_linderi:35.7241,Afroligusticum_aculeolatum:35.7241)Afroligusticum:35.7241,(Heracleum_abyssinicum:35.7241,Heracleum_elgonense:35.7241)Heracleum:35.7241,Diplolophium_africanum:71.4481,Heteromorpha_trifoliata:71.4481,Hydrocotyle_mannii:71.4481,Cryptotaenia_africana:71.4481,(Oenanthe_procumbens:35.7241,Oenanthe_palustris:35.7241)Oenanthe:35.7241,Haplosciadium_abyssinicum:71.4481,(Pimpinella_oreophila:35.7241,Pimpinella_hirtella:35.7241,Pimpinella_keniensis:35.7241)Pimpinella:35.7241,Pseudocarum_eminii:71.4481,Agrocharis_melanantha:71.4481,Centella_asiatica:71.4481,(Sanicula_elata:53.6598,(Alepidea_peduncularis:40.5095,(Anthriscus_sylvestris:17.8632,(Torilis_arvensis:13.6058,Agrocharis_incognita:13.6058):4.25737):22.6463):13.1503):17.7883)Apiaceae:4.79064,Pittosporum_viridiflorum:76.2387):0.34005):18.838):0.900124):4.67238,Ilex_mitis:100.989)Campanulidae:1.88221):4.73798,((((((Synsepalum_brevipes:67.5641,Pouteria_adolfifriederici:67.5641,Chrysophyllum_gorungosanum:67.5641)Sapotaceae:12.0802,(Euclea_divinorum:51.9495,Diospyros_abyssinica:51.9495):27.6947):3.12388,((Erica_trimera:31.0258,Erica_mannii:31.0258)Erica:31.0258,(((Erica_whyteana:0.79553,(Erica_filago:0.298352,Erica_silvatica:0.298352):0.497177):1.35635,Erica_arborea:2.15187):41.352,Agarista_salicifolia:43.5038):18.5478)Ericaceae:20.7165):2.80459,((Embelia_schimperi:27.0199,Embelia_keniensis:27.0199)Embelia:27.0199,(Lysimachia_ruhmeriana:27.0199,Lysimachia_volkensii:27.0199)Lysimachia:27.0199,Maesa_lanceolata:54.0398,Rapanea_melanophloeos:54.0398,(Ardisiandra_wettsteinii:30.3178,(Myrsine_africana:29.1788,(Lysimachia_adoensis:13.9434,(Anagallis_serpens:3.05287,(Anagallis_angustiloba:2.1286,Anagallis_hexamera:2.1286):0.924276):10.8905):15.2354):1.139):23.7221)Primulaceae:31.5329):6.87514,((Impatiens_fischeri:20.9198,Impatiens_mildbraedii:20.9198,Impatiens_meruensis:20.9198,Impatiens_hochstetteri:20.9198,Impatiens_tinctoria:20.9198)Impatiens:20.9198,(Impatiens_pseudoviola:10.584,Impatiens_hoehnelii:10.584):31.2557)Balsaminaceae:50.6082)Ericales:13.2279,(Alangium_chinense:65.4186,Cornus_volkensii:65.4186)Cornaceae:40.2572):1.93366)Asteridae:9.08781,((((((Cerastium_octandrum:25.3025,Cerastium_lanceolatum:25.3025,Cerastium_afromontanum:25.3025)Cerastium:25.3025,Corrigiola_capensis:50.6049,(Uebelinia_crassifolia:25.3025,Uebelinia_rotundifolia:25.3025)Uebelinia:25.3025,(Stellaria_sennii:25.3025,Stellaria_mannii:25.3025)Stellaria:25.3025,(Silene_macrosolen:25.3025,Silene_burchellii:25.3025)Silene:25.3025,(Sagina_afroalpina:25.3025,Sagina_abyssinica:25.3025)Sagina:25.3025,Drymaria_cordata:50.6049)Caryophyllaceae:6.36653,(Celosia_anthelminthica:38.4493,(Cyathula_cylindrica:19.2246,Cyathula_uncinulata:19.2246,Cyathula_polycephala:19.2246)Cyathula:19.2246,(Dysphania_schraderiana:19.2246,Dysphania_procera:19.2246)Dysphania:19.2246,Chenopodium_fasciculosum:38.4493,Aerva_lanata:38.4493,(Amaranthus_blitum:20.2803,(Achyranthes_aspera:10.1938,Pupalia_lappacea:10.1938):10.0864):18.169)Amaranthaceae:18.5222):4.0288,((Delosperma_nakurense:44.3865,Phytolacca_dodecandra:44.3865):12.3325,(Basella_alba:36.41,(Montia_fontana:34.4604,Rhipsalis_baccifera:34.4604):1.9496):20.3091):4.28119):28.4607,(Harpagocarpus_snowdenii:54.0144,Oxygonum_sinuatum:54.0144,(Persicaria_strigosa:27.0072,Persicaria_setosula:27.0072,Persicaria_pulchra:27.0072)Persicaria:27.0072,(Rumex_ruwenzoriensis:27.0072,Rumex_usambarensis:27.0072)Rumex:27.0072,Polygonum_afromontanum:54.0144,((Persicaria_nepalensis:16.2772,(Persicaria_decipiens:3.36474,Persicaria_senegalensis:3.36474):12.9124):19.0666,(Rumex_nepalensis:9.97185,Rumex_abyssinicus:9.97185):25.3719):18.6706)Polygonaceae:35.4465)Caryophyllales:25.7001,((((Phragmanthera_regularis:12.6207,Phragmanthera_usuiensis:12.6207)Phragmanthera:12.6207,(Agelanthus_elegantulus:12.6207,Agelanthus_zizyphifolius:12.6207,Agelanthus_pennatulus:12.6207)Agelanthus:12.6207,Plicosepalus_sagittifolius:25.2414,Oncocalyx_sulfureus:25.2414,((Agelanthus_sansibarensis:1.53722,Englerina_woodfordioides:1.53722):2.10323,Erianthemum_dregei:3.64044):21.6009)Loranthaceae:19.5874,((Arceuthobium_juniperiprocerae:14.0126,Osyridicarpos_schimperianus:14.0126,(Thesium_radicans:7.00628,Thesium_schweinfurthii:7.00628,Thesium_mukense:7.00628,Thesium_kilimandscharicum:7.00628)Thesium:7.00628,(Viscum_fischeri:7.00628,Viscum_tuberculatum:7.00628,Viscum_schimperi:7.00628)Viscum:7.00628,Osyris_lanceolata:14.0126)Santalaceae:25.8949,Opilia_amentacea:39.9075):4.92132):16.1527,Strombosia_scheffleri:60.9815):54.1795):1.53628)Pentapetalae:2.44785,Gunnera_perpensa:119.145):0.020375,(((Laurembergia_tetrandra:89.6298,((Sedum_ruwenzoriense:35.134,Sedum_crassularia:35.134,Sedum_keniense:35.134,Sedum_meyerijohannis:35.134)Sedum:35.134,Umbilicus_botryoides:70.2681,(Crassula_volkensii:35.134,Crassula_alba:35.134,Crassula_alsinoides:35.134,Crassula_granvikii:35.134,Crassula_schimperi:35.134)Crassula:35.134,Kalanchoe_densiflora:70.2681)Crassulaceae:19.3617):18.4618,Trichocladus_ellipticus:108.092)Saxifragales:9.5821,((((((Cliffortia_nitidula:82.294,(Rubus_volkensii:41.147,Rubus_steudneri:41.147,Rubus_scheffleri:41.147,Rubus_apetalus:41.147,Rubus_rigidus:41.147,Rubus_friesiorum:41.147,Rubus_keniensis:41.147,Rubus_pinnatus:41.147)Rubus:41.147,(Alchemilla_cryptantha:41.147,Alchemilla_argyrophylla:41.147,Alchemilla_johnstonii:41.147,Alchemilla_microbetula:41.147,Alchemilla_rothii:41.147,Alchemilla_gracilipes:41.147,Alchemilla_dewildemanii:41.147,Alchemilla_ellenbeckii:41.147,Alchemilla_fischeri:41.147)Alchemilla:41.147,(Hagenia_abyssinica:55.964,Alchemilla_kiwuensis:55.964):26.3301,Prunus_africana:82.294)Rosaceae:6.98304,((((Pilea_sp4:28.1143,Pilea_sp3:28.1143,Pilea_rivularis:28.1143,Pilea_sp1:28.1143,Pilea_sp2:28.1143)Pilea:28.1143,Elatostema_monticola:56.2287,Myrianthus_holstii:56.2287,Pouzolzia_parasitica:56.2287,Girardinia_bullosa:56.2287,Laportea_alatipes:56.2287,(Droguetia_iners:28.1143,Droguetia_debilis:28.1143)Droguetia:28.1143,Urera_hypselodendron:56.2287,Urtica_massaica:56.2287,(Girardinia_diversifolia:38.2222,Pilea_tetraphylla:38.2222):18.0064,Parietaria_debilis:56.2287)Urticaceae:18.0042,((((Dorstenia_scaphigera:27.3984,Dorstenia_afromontana:27.3984,Dorstenia_barnimiana:27.3984)Dorstenia:27.3984,((Ficus_exasperata:7.74026,Ficus_sur:7.74026):29.0876,Ficus_thonningii:36.8279):17.9689)Moraceae:10.6854,(Celtis_africana:8.68836,Trema_orientalis:8.68836):56.7938):5.75205,Chaetachme_aristata:71.2342):2.99866):5.29088,(Gouania_longispicata:76.1799,Helinus_mystacinus:76.1799,Scutia_myrtina:76.1799,(Rhamnus_prinoides:22.1777,Rhamnus_staddo:22.1777):54.0023)Rhamnaceae:3.34382):9.75332)Rosales:16.6589,(((Lagenaria_abyssinica:68.3567,(Zehneria_minutiflora:34.1784,Zehneria_subcoriacea:34.1784)Zehneria:34.1784,Momordica_friesiorum:68.3567,((Momordica_calantha:25.049,Momordica_foetida:25.049):5.16935,((Peponium_vogelii:9.49852,Lagenaria_sphaerica:9.49852):6.74951,(Zehneria_scabra:6.64225,(Oreosyce_africana:1.74707,Cucumis_aculeatus:1.74707):4.89518):9.60579):13.9703):38.1384)Cucurbitaceae:5.02815,(Begonia_wollastonii:18.4982,Begonia_meyerijohannis:18.4982)Begonia:54.8867)Cucurbitales:29.6899,(Morella_sp2:22.0881,Morella_sp1:22.0881)Morella:80.9867):2.86119):1.05941,(((Crotalaria_quartiniana:34.5713,Crotalaria_cylindrica:34.5713,Crotalaria_stolzii:34.5713,Crotalaria_mauensis:34.5713,Crotalaria_jacksonii:34.5713,Crotalaria_sp2:34.5713,Crotalaria_keniensis:34.5713,Crotalaria_brevidens:34.5713,Crotalaria_natalitia:34.5713,Crotalaria_lachnocarpoides:34.5713,Crotalaria_chrysochlora:34.5713,Crotalaria_cleomifolia:34.5713,Crotalaria_sp1:34.5713,Crotalaria_lebrunii:34.5713,Crotalaria_deserticola:34.5713,Crotalaria_axillaris:34.5713)Crotalaria:34.5713,(Eriosema_jurionianum:34.5713,Eriosema_buchananii:34.5713,Eriosema_montanum:34.5713,Eriosema_scioanum:34.5713)Eriosema:34.5713,Acacia_pentagona:69.1425,(Rhynchosia_pseudoviscosa:34.5713,Rhynchosia_hirta:34.5713,Rhynchosia_kilimandscharica:34.5713,Rhynchosia_ferruginea:34.5713,Rhynchosia_holstii:34.5713,Rhynchosia_usambarensis:34.5713)Rhynchosia:34.5713,Caesalpinia_volkensii:69.1425,Erythrina_abyssinica:69.1425,Hylodesmum_repandum:69.1425,(Indigofera_sp1:34.5713,Indigofera_longibarbata:34.5713,Indigofera_sp3:34.5713,Indigofera_brevicalyx:34.5713,Indigofera_sp2:34.5713,Indigofera_nairobiensis:34.5713)Indigofera:34.5713,(Lotus_becquetii:34.5713,Lotus_goetzei:34.5713)Lotus:34.5713,(Trifolium_tembense:34.5713,Trifolium_cryptopodium:34.5713,Trifolium_multinerve:34.5713)Trifolium:34.5713,Chamaecrista_usambarensis:69.1425,Galega_battiscombei:69.1425,(Argyrolobium_sp1:34.5713,Argyrolobium_sp2:34.5713,Argyrolobium_friesianum:34.5713,Argyrolobium_fischeri:34.5713)Argyrolobium:34.5713,Lathyrus_hygrophilus:69.1425,Macrotyloma_axillare:69.1425,Pseudarthria_hookeri:69.1425,Sesbania_keniensis:69.1425,Parochetus_africanus:69.1425,Aeschynomene_abyssinica:69.1425,Albizia_gummifera:69.1425,Kotschya_recurvifolia:69.1425,Amphicarpaea_africana:69.1425,Otholobium_foliosum:69.1425,(Tephrosia_interrupta:34.5713,Tephrosia_holstii:34.5713)Tephrosia:34.5713,(Vigna_parkeri:34.5713,Vigna_friesiorum:34.5713,Vigna_schimperi:34.5713)Vigna:34.5713,Zornia_setosa:69.1425,Glycine_wrightii:69.1425,Vicia_paucifolia:69.1425,Dalbergia_lactea:69.1425,Dolichos_kilimandscharicus:69.1425,Bauhinia_thonningii:69.1425,((Pterolobium_stellatum:43.4522,((Senna_didymobotrya:9.33423,Senna_obtusifolia:9.33423):32.7665,(Newtonia_buchananii:8.21546,Acacia_drepanolobium:8.21546):33.8853):1.35146):14.1301,((Kotschya_aeschynomenoides:7.66487,Aeschynomene_schimperi:7.66487):46.0805,((Crotalaria_incana:19.2716,(Lupinus_princei:4.74666,Adenocarpus_mannii:4.74666):14.5249):33.8019,((((Indigofera_arrecta:9.46318,Indigofera_swaziensis:9.46318):18.0535,Indigofera_spicata:27.5167):13.6162,(Millettia_dura:35.0921,Vigna_vexillata:35.0921):6.04084):0.60268,((Colutea_abyssinica:20.6712,Astragalus_atropilosulus:20.6712):5.91974,(Medicago_lupulina:13.38,(Trifolium_semipilosum:1.8261,(Trifolium_burchellianum:1.13186,Trifolium_usambarense:1.13186):0.694245):11.5539):13.2109):15.1447):11.3379):0.671859):3.83694):11.5602)Fabaceae:2.90626,(Polygala_steudneri:30.0631,Polygala_sphenoptera:30.0631,Polygala_abyssinica:30.0631,Polygala_sadebeckiana:30.0631)Polygala:41.9857)Fabales:34.9466):6.26322,((((((((((((Viola_eminii:29.5247,Viola_nannae:29.5247,Viola_abyssinica:29.5247)Viola:59.5072,(Adenia_gummifera:10.2143,Adenia_rumicifolia:10.2143):78.8177):7.86774,((Casearia_battiscombei:39.2372,Casearia_gladiiformis:39.2372)Casearia:39.2372,Oncoba_routledgei:78.4744,Scolopia_zeyheri:78.4744,Dovyalis_abyssinica:78.4744,Trimeria_grandifolia:78.4744)Salicaceae:18.4253):1.24589,Rawsonia_lucida:98.1456):1.18105,Drypetes_gerrardii:99.3266):1.25462,((Euphorbia_ugandensis:49.694,Euphorbia_brevicornu:49.694,Euphorbia_engleri:49.694,Euphorbia_sp1:49.694,Euphorbia_sp2:49.694,Euphorbia_wellbyi:49.694)Euphorbia:49.694,(Acalypha_paniculata:49.694,Acalypha_volkensii:49.694,Acalypha_brachystachya:49.694)Acalypha:49.694,Alchornea_hirtella:99.388,(Clutia_abyssinica:49.694,Clutia_kilimandscharica:49.694)Clutia:49.694,(Croton_macrostachyus:49.694,Croton_megalocarpus:49.694,Croton_alienus:49.694)Croton:49.694,Erythrococca_bongensis:99.388,(Macaranga_capensis:49.694,Macaranga_kilimandscharica:49.694)Macaranga:49.694,Micrococca_holstii:99.388,Neoboutonia_macrocalyx:99.388,Tragia_brevipes:99.388,(Euphorbia_depauperata:31.0119,(Euphorbia_abyssinica:29.4701,Euphorbia_inaequilatera:29.4701):1.54181):68.3761)Euphorbiaceae:1.19323):0.532812,((Cassipourea_malosana:44.0012,Cassipourea_gummiflua:44.0012)Cassipourea:54.293,(((Hypericum_peplidifolium:28.537,Hypericum_annulatum:28.537,Hypericum_kiboense:28.537,Hypericum_sp1:28.537,Hypericum_afromontanum:28.537,Hypericum_sp2:28.537,Hypericum_scioanum:28.537)Hypericum:28.537,Harungana_madagascariensis:57.074)Hypericaceae:14.111,(Garcinia_volkensii:68.7467,Hypericum_roeperianum:68.7468)Clusiaceae:2.43827):27.1091):2.81992):2.19471,(Linum_volkensii:14.0419,Linum_keniense:14.0419)Linum:89.2669):0.986243,((Phyllanthus_fischeri:49.1598,Phyllanthus_boehmii:49.1598)Phyllanthus:49.1598,Margaritaria_discoidea:98.3195)Phyllanthaceae:5.9755):1.55303,(Ochna_holstii:30.2807,Ochna_insculpta:30.2807)Ochna:75.5674)Malpighiales:5.53298,((Oxalis_obliquifolia:56.4592,Oxalis_corniculata:56.4592)Oxalidaceae:5.11895,(Agelaea_pentagyna:26.8146,Rourea_thomsonii:26.8146)Connaraceae:34.7635):49.8029):0.109862,((Cassine_aethiopica:33.8718,Cassine_buchananii:33.8718)Cassine:33.8718,(Gymnosporia_obscura:33.8718,Gymnosporia_heterophylla:33.8718,Gymnosporia_keniensis:33.8718)Gymnosporia:33.8718,Maytenus_acuminata:67.7436,((Maytenus_undata:40.2288,(Gymnosporia_senegalensis:7.69057,Gymnosporia_arbutifolia:7.69057):32.5383):5.12947,(Hippocratea_goetzei:21.2757,Apodostigma_pallens:21.2757):24.0826):22.3853)Celastraceae:43.7473):1.76773)Fabidae:4.27613,(((((Geranium_vagans:36.8672,Geranium_kilimandscharicum:36.8672,Geranium_sp1:36.8672,Geranium_aculeolatum:36.8672,Geranium_mascatense:36.8672,Geranium_sp2:36.8672)Geranium:36.8672,Pelargonium_whytei:73.7344,(Pelargonium_alchemilloides:49.0001,(Monsonia_angustifolia:42.2467,Geranium_purpureum:42.2467):6.75336):24.7343)Geraniaceae:35.6999,Bersama_abyssinica:109.434)Geraniales:3.81617,((((((Hibiscus_macranthus:34.5597,Hibiscus_aethiopicus:34.5597,Hibiscus_aponeurus:34.5597,Hibiscus_vitifolius:34.5597,Hibiscus_diversifolius:34.5597,Hibiscus_fuscus:34.5597,Hibiscus_ludwigii:34.5597,Hibiscus_calyphyllus:34.5597)Hibiscus:34.5597,(Kosteletzkya_adoensis:34.5597,Kosteletzkya_begoniifolia:34.5597)Kosteletzkya:34.5597,(Pavonia_kilimandscharica:34.5597,Pavonia_urens:34.5597,Pavonia_burchellii:34.5597,Pavonia_schimperiana:34.5597)Pavonia:34.5597,(Sida_ternata:34.5597,Sida_schimperiana:34.5597,Sida_tenuicarpa:34.5597,Sida_acuta:34.5597)Sida:34.5597,(Abutilon_angulatum:34.5597,Abutilon_longicuspe:34.5597,Abutilon_mauritianum:34.5597)Abutilon:34.5597,Sparmannia_ricinocarpa:69.1194,(Triumfetta_brachyceras:34.5597,Triumfetta_tomentosa:34.5597)Triumfetta:34.5597,Dombeya_torrida:69.1194,Grewia_similis:69.1194,Cola_greenwayi:69.1194,(Dombeya_burgessiae:44.0762,(Triumfetta_rhomboidea:32.7366,((Urena_lobata:2.4774,(Hibiscus_surattensis:1.52508,Hibiscus_cannabinus:1.52508):0.95232):17.3017,Sida_rhombifolia:19.7791):12.9576):11.3396):25.0432)Malvaceae:11.8802,(Struthiola_thomsonii:58.6919,Peddiea_fischeri:58.6919,Gnidia_glauca:58.6919)Thymelaeaceae:22.3076)Malvales:19.5141,(((((Zanthoxylum_gilletii:45.4732,Fagaropsis_angolensis:45.4732,(Vepris_nobilis:22.7366,Vepris_trichocarpa:22.7366)Vepris:22.7366,(Clausena_anisata:28.5711,((Calodendrum_capense:14.8353,Toddalia_asiatica:14.8353):1.89886,Vepris_simplicifolia:16.7341):11.8369):16.9021)Rutaceae:4.52735,Brucea_antidysenterica:50.0005):3.58192,(Trichilia_dregeana:52.7612,(Turraea_holstii:26.3806,Turraea_robusta:26.3806)Turraea:26.3806,(Lovoa_swynnertonii:51.3927,(Lepidotrichilia_volkensii:26.8384,(Ekebergia_capensis:8.21642,Trichilia_emetica:8.21642):18.6219):24.5543):1.36845)Meliaceae:0.821294):15.0801,((Allophylus_abyssinicus:33.1251,Allophylus_ferrugineus:33.1251,Allophylus_rubifolius:33.1251)Allophylus:33.1251,Deinbollia_kilimandscharica:66.2502,(Dodonaea_viscosa:38.8874,Cardiospermum_halicacabum:38.8874):27.3629)Sapindaceae:2.41233):2.27819,(Searsia_pyroides:1.94867,Searsia_natalensis:1.94867):68.9921):29.5729):0.908691,((((Maerua_triphylla:71.2242,Ritchiea_albersii:71.2242,Capparis_sepiaria:71.2242,Capparis_tomentosa:71.2242)Capparaceae:5.8859,Cylicomorpha_parviflora:77.1101):0.057202,Caylusea_abyssinica:77.1673):0.151612,((Cleome_schimperi:65.2998,(Cleome_gynandra:13.5734,(Cleome_hirta:3.45723,Cleome_monophylla:3.45723):10.1161):51.7264)Cleomaceae:3.94906,(Barbarea_intermedia:60.7464,Oreophyton_falcatum:60.7464,Subularia_monticola:60.7464,Thlaspi_alliaceum:60.7464,(Cardamine_obliqua:30.3732,Cardamine_trichocarpa:30.3732)Cardamine:30.3732,Crambe_kilimandscharica:60.7464,((Lepidium_africanum:11.0853,((Cardamine_hirsuta:4.18658,Cardamine_africana:4.18658):6.36531,(Arabidopsis_thaliana:5.03696,Turritis_glabra:5.03696):5.51493):0.533434):2.98181,Arabis_alpina:14.0671):46.6792)Brassicaceae:8.50249):8.07008):24.1034):9.59952,(((((Olinia_rochetiana:65.4274,Antherotoma_senegambiensis:65.4274):17.4644,(Syzygium_intermedium:71.3021,(Syzygium_guineense:0.208109,Syzygium_cordatum:0.208109):71.0939)Myrtaceae:11.5898):3.60106,Lythrum_rotundifolium:86.4929):0.728903,Combretum_molle:87.2218):0.978722,((Epilobium_salignum:31.262,Epilobium_stereophyllum:31.262)Epilobium:31.262,Epilobium_hirsutum:62.524)Onagraceae:25.6765)Myrtales:22.8213):2.22862)Malvidae:3.62701,((Cyphostemma_knittelii:55.9567,Cyphostemma_sp2:55.9567,Cyphostemma_pseudonjegerre:55.9567,Cyphostemma_maranguense:55.9567,Cyphostemma_sp1:55.9567)Cyphostemma:55.9567,Cissus_oliveri:111.913,(Rhoicissus_tridentata:41.4284,Cyphostemma_cyphopetalum:41.4284):70.485)Vitales:4.96409):0.657279)Rosidae:0.138911)Superrosidae:1.49186)Gunneridae:17.735,((((Berberis_holstii:124.4,((Clematis_hirsuta:52.7228,Clematis_simensis:52.7228)Clematis:52.7228,Anemone_thomsonii:105.446,Delphinium_macrocentrum:105.446,(Ranunculus_oreophytus:52.7228,Ranunculus_volkensii:52.7228,Ranunculus_keniensis:52.7228,Ranunculus_aberdaricus:52.7228,Ranunculus_fratrum:52.7228)Ranunculus:52.7228,Thalictrum_boivinianum:105.446,(Thalictrum_rhynchocarpum:81.8862,Ranunculus_multifidus:81.8862):23.5595)Ranunculaceae:18.9548):3.57208,((Cissampelos_keniensis:33.5297,Cissampelos_friesiorum:33.5297,Cissampelos_mucronata:33.5297)Cissampelos:33.5297,(Stephania_cyanantha:33.5297,Stephania_abyssinica:33.5297)Stephania:33.5297)Menispermaceae:60.9131):4.90993,(Fumaria_abyssinica:112.982,Corydalis_mildbraedii:112.982)Papaveraceae:19.9001):3.20966,(Faurea_arborea:92.3053,Protea_caffra:92.3053)Proteaceae:43.7868):0.808344)Eudicotyledoneae:43.7278,(((((Ocotea_usambarensis:44.0642,Ocotea_kenyensis:44.0642)Ocotea:46.1721,Xymalos_monospora:90.2363):30.4641,((Monanthotaxis_schweinfurthii:22.7488,Monanthotaxis_parvifolia:22.7488)Monanthotaxis:22.7488,Uvariodendron_anisatum:45.4977,Uvaria_lucida:45.4977)Annonaceae:75.2027):17.2139,Warburgia_ugandensis:137.914):9.1509,(Peperomia_abyssinica:31.2259,((Peperomia_tetraphylla:24.4552,Peperomia_retusa:24.4552):2.57712,(Piper_capense:20.3384,Piper_umbellatum:20.3384):6.69382):4.19359)Piperaceae:115.839)Magnoliidae:33.5631):7.65496,(((Culcasia_falcifolia:123.182,(Arisaema_ruwenzoricum:61.5908,Arisaema_mildbraedii:61.5908)Arisaema:61.5908,Lemna_minor:123.182)Araceae:21.9487,(Alisma_plantagoaquatica:96.4787,(Potamogeton_schweinfurthii:19.5851,Potamogeton_richardii:19.5851)Potamogeton:76.8936):48.6517)Alismatales:13.2117,((((((Koeleria_capensis:47.7638,(Poa_leptoclada:23.8819,Poa_muhavurensis:23.8819,Poa_schimperiana:23.8819)Poa:23.8819,(Andropogon_schirensis:23.8819,Andropogon_amethystinus:23.8819,Andropogon_lima:23.8819,Andropogon_chrysostachyus:23.8819)Andropogon:23.8819,Aristida_adoensis:47.7638,Bothriochloa_insculpta:47.7638,Brachiaria_scalaris:47.7638,Coelachne_africana:47.7638,(Panicum_subalbidum:23.8819,Panicum_calvum:23.8819,Panicum_trichocladum:23.8819,Panicum_eickii:23.8819,Panicum_hymeniochilum:23.8819)Panicum:23.8819,(Eleusine_multiflora:23.8819,Eleusine_jaegeri:23.8819)Eleusine:23.8819,(Hyparrhenia_umbrosa:23.8819,Hyparrhenia_dregeana:23.8819,Hyparrhenia_papillipes:23.8819,Hyparrhenia_cymbaria:23.8819,Hyparrhenia_nyassae:23.8819,Hyparrhenia_collina:23.8819)Hyparrhenia:23.8819,(Pennisetum_sphacelatum:23.8819,Pennisetum_hohenackeri:23.8819,Pennisetum_trachyphyllum:23.8819,Pennisetum_macrourum:23.8819)Pennisetum:23.8819,Poecilostachys_oplismenoides:47.7638,(Pentaschistis_borussica:23.8819,Pentaschistis_pictigluma:23.8819)Pentaschistis:23.8819,(Sporobolus_olivaceus:23.8819,Sporobolus_agrostoides:23.8819,Sporobolus_macranthelus:23.8819,Sporobolus_mildbraedii:23.8819)Sporobolus:23.8819,Yushania_alpina:47.7638,Polypogon_schimperianus:47.7638,Setaria_megaphylla:47.7638,(Cymbopogon_nardus:23.8819,Cymbopogon_caesius:23.8819)Cymbopogon:23.8819,(Digitaria_abyssinica:23.8819,Digitaria_velutina:23.8819,Digitaria_maitlandii:23.8819,Digitaria_ternata:23.8819,Digitaria_diagonalis:23.8819)Digitaria:23.8819,Echinochloa_pyramidalis:47.7638,Acritochaete_volkensii:47.7638,(Agrostis_volkensii:23.8819,Agrostis_trachyphylla:23.8819,Agrostis_gracilifolia:23.8819,Agrostis_sclerophylla:23.8819,Agrostis_producta:23.8819,Agrostis_quinqueseta:23.8819,Agrostis_keniensis:23.8819,Agrostis_pilgeriana:23.8819,Agrostis_kilimandscharica:23.8819)Agrostis:23.8819,(Helictotrichon_umbrosum:23.8819,Helictotrichon_elongatum:23.8819,Helictotrichon_lachnanthum:23.8819,Helictotrichon_milanjianum:23.8819,Helictotrichon_angustum:23.8819)Helictotrichon:23.8819,Brachypodium_flexum:47.7638,Exotheca_abyssinica:47.7638,Enneapogon_persicus:47.7638,(Eragrostis_olivacea:23.8819,Eragrostis_schweinfurthii:23.8819,Eragrostis_macilenta:23.8819,Eragrostis_tenuifolia:23.8819,Eragrostis_amanda:23.8819)Eragrostis:23.8819,Eulalia_polyneura:47.7638,Anthoxanthum_nivale:47.7638,(Bromus_leptoclados:23.8819,Bromus_pectinatus:23.8819)Bromus:23.8819,(Calamagrostis_hedbergii:23.8819,Calamagrostis_epigejos:23.8819)Calamagrostis:23.8819,(Colpodium_chionogeiton:23.8819,Colpodium_hedbergii:23.8819)Colpodium:23.8819,(Festuca_chodatiana:23.8819,Festuca_simensis:23.8819,Festuca_africana:23.8819,Festuca_engleri:23.8819,Festuca_abyssinica:23.8819,Festuca_pilgeri:23.8819,Festuca_costata:23.8819)Festuca:23.8819,Sacciolepis_africana:47.7638,Stipa_keniensis:47.7638,Miscanthus_violaceus:47.7638,Oplismenus_hirtellus:47.7638,Deschampsia_flexuosa:47.7638,((Olyra_latifolia:14.197,(Streblochaete_longiarista:7.13925,(Vulpia_myuros:2.83697,(Aira_caryophyllea:2.46532,((Deschampsia_cespitosa:2.13091,Phalaris_arundinacea:2.13091):0.134319,Poa_annua:2.26523):0.20009):0.371652):4.30227):7.05776):4.93162,(Ehrharta_erecta:17.9703,(Isachne_mauritiana:12.5653,((((Hyparrhenia_hirta:0.095385,Andropogon_distachyos:0.095385):0.615417,Themeda_triandra:0.7108):4.99455,(Paspalum_scrobiculatum:2.67557,(Oplismenus_compositus:1.88407,(Panicum_coloratum:0.908476,((Melinis_repens:0.434635,Brachiaria_bovonei:0.434635):0.445624,(Setaria_sphacelata:0.275997,((Setaria_poiretiana:0.066677,Setaria_pumila:0.066676):0.18745,Pennisetum_clandestinum:0.254126):0.02187):0.604262):0.028218):0.975592):0.791505):3.02978):3.97523,((Sporobolus_africanus:1.20334,Sporobolus_fimbriatus:1.20333):1.74063,((Harpachne_schimperi:0.223677,(Eragrostis_racemosa:0.054107,Eragrostis_paniciformis:0.054107):0.169569):2.19133,(Eleusine_indica:0.765909,Chloris_pycnothrix:0.76591):1.6491):0.528957):6.73662):2.88475):5.40493):1.15836):28.6352)Poaceae:34.2758,(Eriocaulon_schimperi:29.7914,Eriocaulon_volkensii:29.7914)Eriocaulon:52.2482):2.18091,((((Carex_congolensis:18.1409,Carex_elgonensis:18.1409,Carex_erythrorrhiza:18.1409,Carex_vallisrosetto:18.1409,Carex_chlorosaccus:18.1409,Carex_johnstonii:18.1409,Carex_simensis:18.1409,Carex_phragmitoides:18.1409,Carex_peregrina:18.1409,Carex_sp2:18.1409,Carex_sp1:18.1409,Carex_clavata:18.1409)Carex:18.1409,Bulbostylis_boeckeleriana:36.2818,Scleria_melanomphala:36.2818,(Cyperus_derreilema:18.1409,Cyperus_aterrimus:18.1409,Cyperus_pectinatus:18.1409,Cyperus_platycaulis:18.1409,Cyperus_fischerianus:18.1409,Cyperus_ajax:18.1409,Cyperus_haspan:18.1409,Cyperus_latifolius:18.1409,Cyperus_denudatus:18.1409,Cyperus_luteus:18.1409,Cyperus_kerstenii:18.1409,Cyperus_afroalpinus:18.1409,Cyperus_albosanguineus:18.1409,Cyperus_digitatus:18.1409,Cyperus_tomaiophyllus:18.1409,Cyperus_hemisphaericus:18.1409,Cyperus_impubes:18.1409,Cyperus_karisimbiensis:18.1409)Cyperus:18.1409,(Fuirena_stricta:18.1409,Fuirena_pubescens:18.1409)Fuirena:18.1409,(Kyllinga_odorata:18.1409,Kyllinga_erecta:18.1409)Kyllinga:18.1409,(Pycreus_elegantulus:18.1409,Pycreus_nitidus:18.1409,Pycreus_nigricans:18.1409)Pycreus:18.1409,Rhynchospora_rugosa:36.2818,(Schoenoxiphium_sparteum:18.1409,Schoenoxiphium_lehmannii:18.1409)Schoenoxiphium:18.1409,(Cladium_mariscus:29.6815,(((((Bulbostylis_densa:4.03186,Bulbostylis_atrosanguinea:4.03186):2.99485,(Fimbristylis_ovata:2.8708,Fimbristylis_complanata:2.8708):4.15591):0.330151,Eleocharis_marginulata:7.35686):4.53664,((Schoenoplectus_corymbosus:0.386849,Schoenoplectus_confusus:0.386849):8.10888,((Ficinia_gracilis:3.55887,(Isolepis_sepulcralis:3.19393,(Isolepis_fluitans:2.6813,((Isolepis_setacea:0.216836,Isolepis_keniaensis:0.216836):1.41852,Isolepis_costata:1.63535):1.04594):0.512637):0.364935):3.393,((Cyperus_involucratus:3.66165,Cyperus_dichrostachyus:3.66165):1.37468,(Kyllinga_bulbosa:3.61245,(Kyllinga_brevifolia:1.31786,(Cyperus_rigidifolius:0.801596,Cyperus_plateilema:0.801596):0.51626):2.2946):1.42388):1.91554):1.54385):3.39777):2.80184,((Carex_monostachya:6.40425,Carex_conferta:6.40425):1.67987,((Carex_runssoroensis:0.384056,Carex_echinochloe:0.384056):6.27035,(Carex_bequaertii:2.71188,Carex_petitiana:2.71188):3.94253):1.42971):6.61121):14.9862):6.60027)Cyperaceae:12.3978,(Juncus_dregeanus:32.5578,((Luzula_johnstonii:17.7573,Luzula_abyssinica:17.7572):14.552,(Juncus_effusus:28.9593,Juncus_oxycarpus:28.9593):3.34992):0.248628)Juncaceae:16.1217):17.1903,Xyris_capensis:65.8699):18.3506):5.94901,Typha_latifolia:90.1695)Poales:33.002,(((Cyanotis_arachnoidea:73.8789,(Commelina_eckloniana:36.9394,Commelina_africana:36.9394,Commelina_purpurea:36.9394,Commelina_foliacea:36.9394,Commelina_latifolia:36.9394,Commelina_diffusa:36.9394)Commelina:36.9394,Aneilema_leiocaule:73.8789,(Murdannia_clarkeana:33.8823,Commelina_benghalensis:33.8823):39.9966)Commelinaceae:34.2754,((Aframomum_zambesiacum:83.1732,Aframomum_angustifolium:83.1732)Zingiberaceae:23.7091,Ensete_ventricosum:106.882)Zingiberales:1.27196):12.7174,Phoenix_reclinata:120.872):2.29988)Commelinidae:11.6939,(((Wurmbea_tenuis:84.1719,Androcymbium_striatum:84.1719)Colchicaceae:22.2878,(Smilax_aspera:14.1918,Smilax_anceps:14.1918):92.2679):28.2533,((((((Albuca_virens:70.6927,Anthericum_corymbosum:70.6927,(Dracaena_afromontana:35.3463,Dracaena_laxissima:35.3463,Dracaena_steudneri:35.3463)Dracaena:35.3463,(Asparagus_africanus:35.3463,Asparagus_aridicola:35.3463)Asparagus:35.3463,Ornithogalum_gracillimum:70.6927,Drimiopsis_botryoides:70.6927,(Ledebouria_revoluta:70.4456,(Chlorophytum_comosum:68.8889,(Asparagus_setaceus:19.8494,Asparagus_racemosus:19.8494):49.0395):1.55672):0.24706)Asparagaceae:0.525599,(Crinum_kirkii:67.4725,Scadoxus_multiflorus:67.4725)Amaryllidaceae:3.74573):4.40764,(Aloe_lateritia:63.1308,Bulbine_abyssinica:63.1308,Trachyandra_saltii:63.1308,Kniphofia_thomsonii:63.1308)Xanthorrhoeaceae:12.4951):22.2491,((Aristea_alata:40.6439,Aristea_angolensis:40.6439)Aristea:40.6439,(Romulea_camerooniana:40.6439,Romulea_congoensis:40.6439,Romulea_fischeri:40.6439)Romulea:40.6439,Dierama_cupuliflorum:81.2879,Hesperantha_petitiana:81.2879,Moraea_stricta:81.2879,(Gladiolus_watsonioides:36.8127,Gladiolus_dalenii:36.8127):44.4752)Iridaceae:16.5871):25.9891,((Angraecum_sacciferum:55.7225,Angraecum_decipiens:55.7225)Angraecum:55.7225,Bonatea_volkensiana:111.445,Calanthe_sylvatica:111.445,(Cynorkis_anacamptoides:55.7225,Cynorkis_kassneriana:55.7225)Cynorkis:55.7225,(Eulophia_horsfallii:55.7225,Eulophia_hians:55.7225)Eulophia:55.7225,(Habenaria_attenuata:55.7225,Habenaria_filicornis:55.7225,Habenaria_humilior:55.7225,Habenaria_cornuta:55.7225,Habenaria_altior:55.7225,Habenaria_bracteosa:55.7225)Habenaria:55.7225,(Holothrix_pentadactyla:55.7225,Holothrix_arachnoidea:55.7225)Holothrix:55.7225,Rhipidoglossum_montanum:111.445,(Polystachya_transvaalensis:55.7225,Polystachya_simplex:55.7225,Polystachya_caespitifica:55.7225)Polystachya:55.7225,Liparis_bowkeri:111.445,Satyrium_robustum:111.445,Stolzia_repens:111.445,(Disa_fragrans:55.7225,Disa_scutellifera:55.7225)Disa:55.7225,(Disperis_kilimanjarica:55.7225,Disperis_nemorosa:55.7225)Disperis:55.7225,(Aerangis_luteoalba:55.7225,Aerangis_brachycarpa:55.7225)Aerangis:55.7225,Epipactis_africana:111.445,(((Habenaria_petitiana:16.2096,(Satyrium_sceptrum:11.1138,(Satyrium_coriophoroides:10.4213,Satyrium_crassicaule:10.4213):0.692545):5.09582):11.4577,Disa_stairsii:27.6673):53.7287,(((Polystachya_cultriformis:4.77256,Polystachya_spatella:4.77256):24.9226,((Angraecum_erectum:9.16486,Angraecum_conchiferum:9.16486):5.18629,((Diaphananthe_lorifolia:6.53232,(Chamaeangis_vesicata:2.06524,Chamaeangis_sarcophylla:2.06524):4.46708):7.62608,((Rhipidoglossum_subsimplex:2.52685,Rhipidoglossum_rutilum:2.52685):3.03479,(((Tridactyle_scottellii:1.83628,Tridactyle_bicaudata:1.83628):1.64132,(Cyrtorchis_arcuata:2.84298,(Rangaeris_amaniensis:2.04874,(Ypsilopus_longifolius:0.507741,Tridactyle_furcistipes:0.507741):1.541):0.794244):0.63461):1.65099,(Aerangis_confusa:2.29956,(Aerangis_coriacea:1.46268,Aerangis_thomsonii:1.46268):0.836876):2.82903):0.433047):8.59676):0.192752):15.3441):2.33138,Oeceoclades_saundersiana:32.0266):49.3695):30.0489)Orchidaceae:12.4191):1.04654,(Hypoxis_kilimanjarica:13.2534,Hypoxis_obtusa:13.2534)Hypoxis:111.657)Asparagales:9.80233):0.152371):23.4767)Nartheciidae:29.9412):54.9864,Nymphaea_nouchali:243.27)Angiospermae:108.965,(Juniperus_procera:230.88,(Afrocarpus_gracilior:40.9054,Podocarpus_milanjianus:40.9054):189.974)Cupressophyta:121.355)Spermatophyta:88.0587;
